# Supplementary material for: Proteomics data in vitiligo: a scoping review
Source: bioRxiv or medRxiv preprint supplement (doi:10.1101/2024.02.26.24303359), 2024-02-27

Supplementary Figure 1: PRISMA Flow Chart

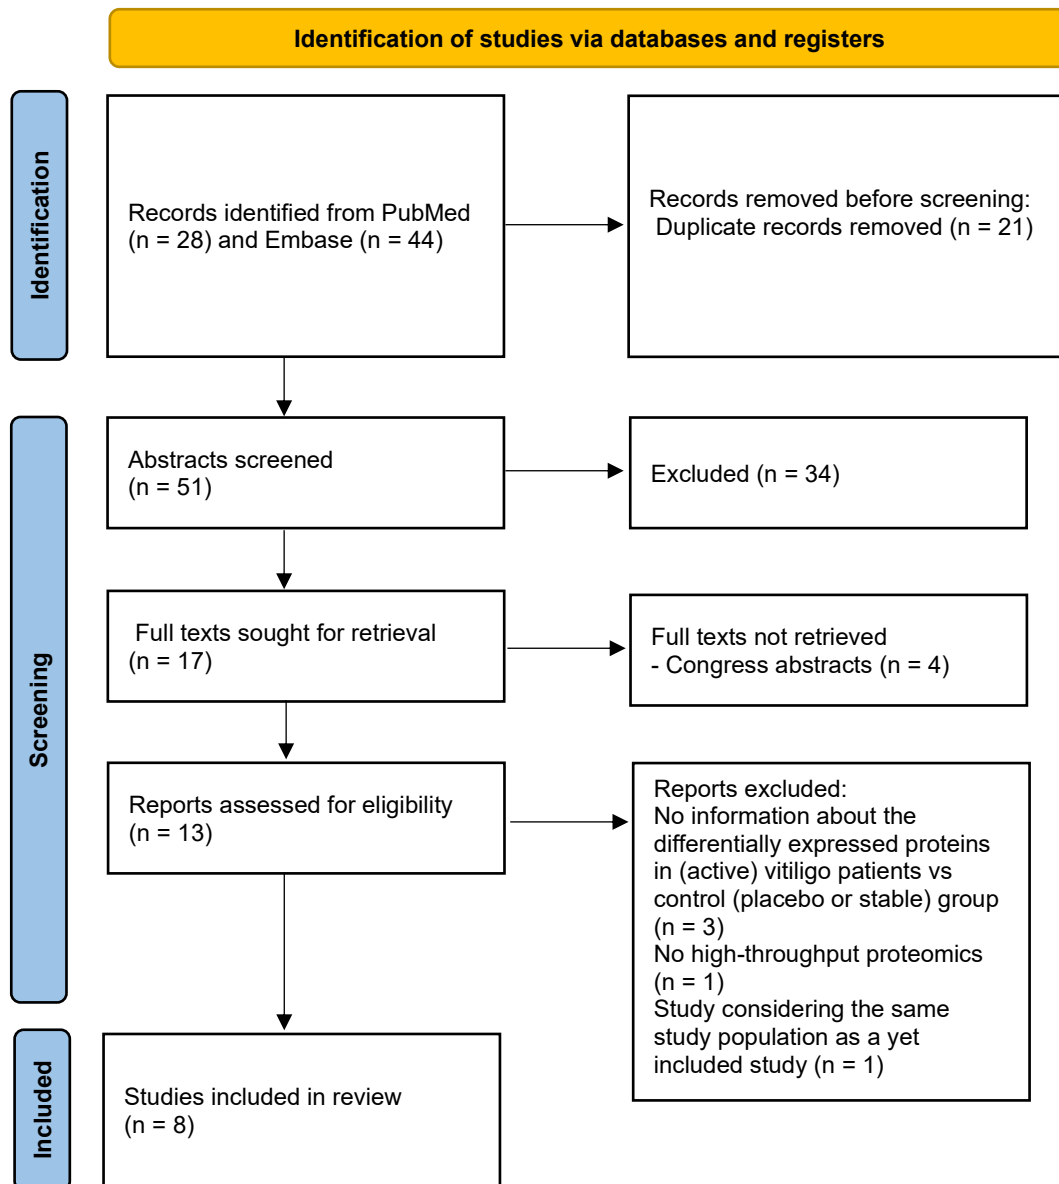

Supplement: Supplementary file [file media-1.pdf]
